# Supplementary material for: π-Cooperativity effect on the base stacking interactions in DNA: is there a novel stabilization factor coupled with base pairing H-bonds?
Source: Royal Society of Chemistry journal article supplement (doi:10.1039/c4cp00997e), 2014-01-01
Supplement: c4cp00997e1.pdf [file c4cp00997e1.pdf]

## ELECTRONIC SUPPLEMENTARY INFORMATION FOR

### $\pi$ -Cooperativity Effect on the Base Stacking Interactions in DNA: Is There a Novel Stabilization Factor Coupled with Base Pairing H-Bonds?

Hande Karabiyik, Resul Sevinçek and Hasan Karabiyik\*

Dokuz Eylül University, Department of Physics, 35160-Tinaztepe, İzmir, Turkey

e-mail: hasan.karabiyik@deu.edu.tr

\*To whom correspondence should be addressed:

Dokuz Eylül University, Department of Physics, 35160-Tinaztepe, İzmir, Turkey

Tel: +90-232-3018673

Fax: +90-232-4534188

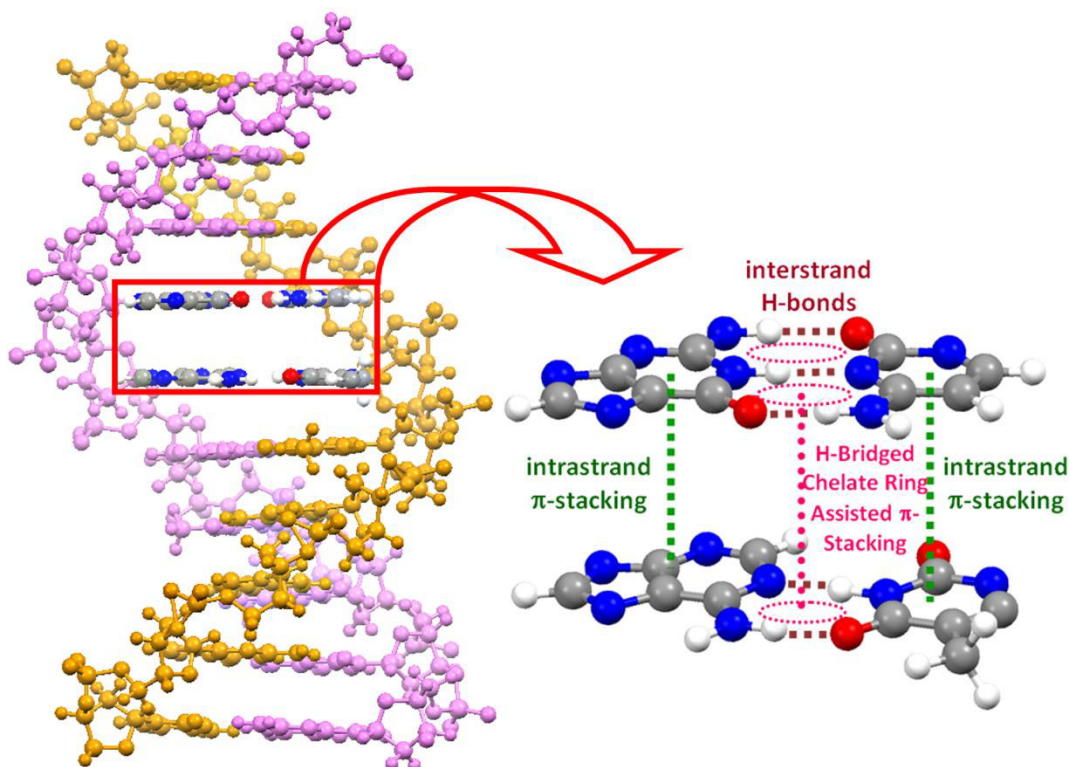

**Figure S1.** Variations of local aromaticity of nucleobases against H atom movements through RAHBs in the considered dinucleotide steps.

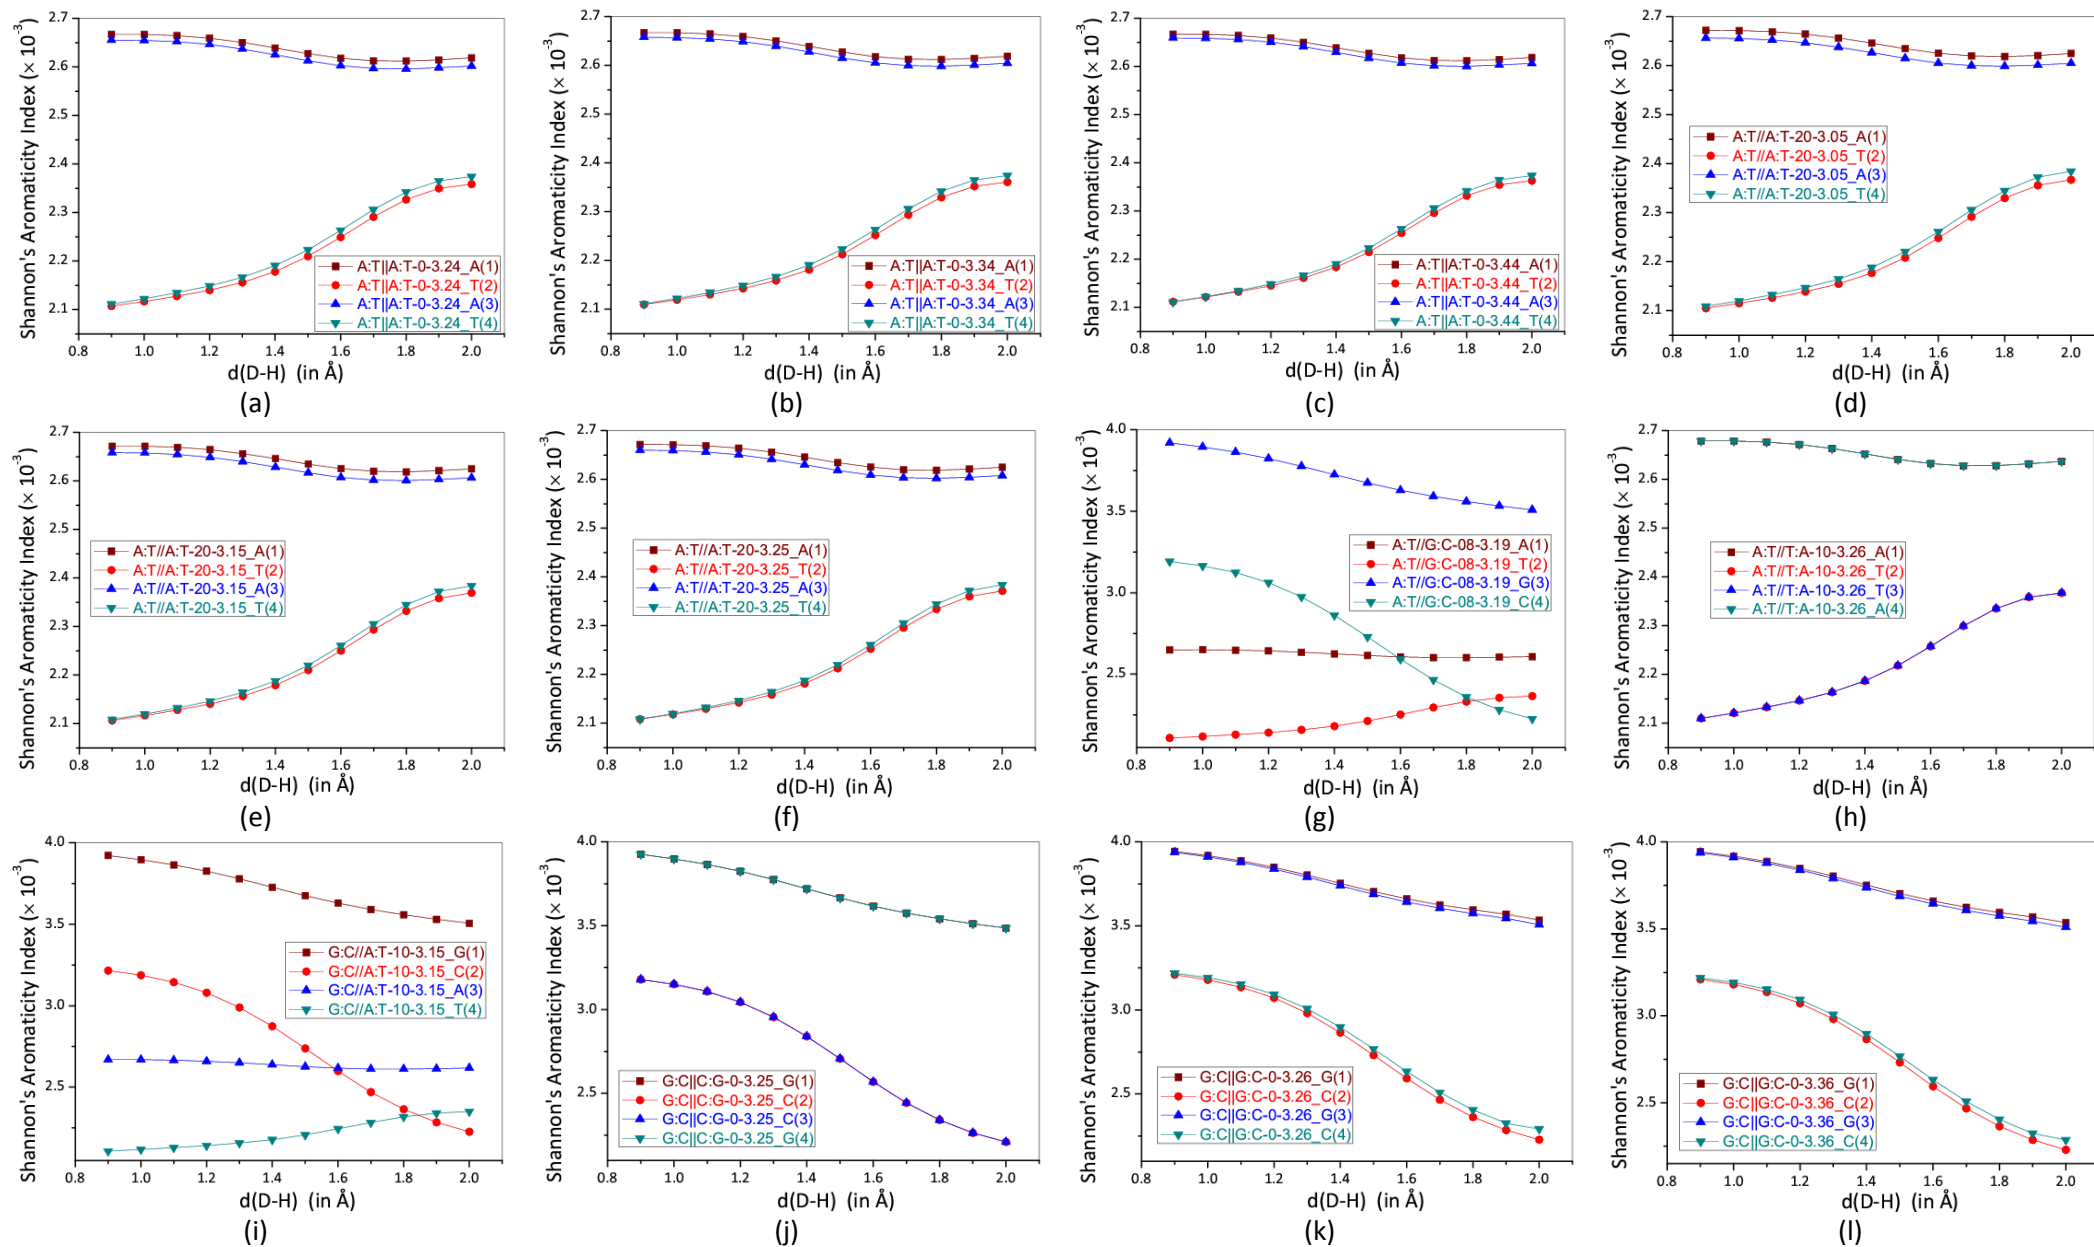

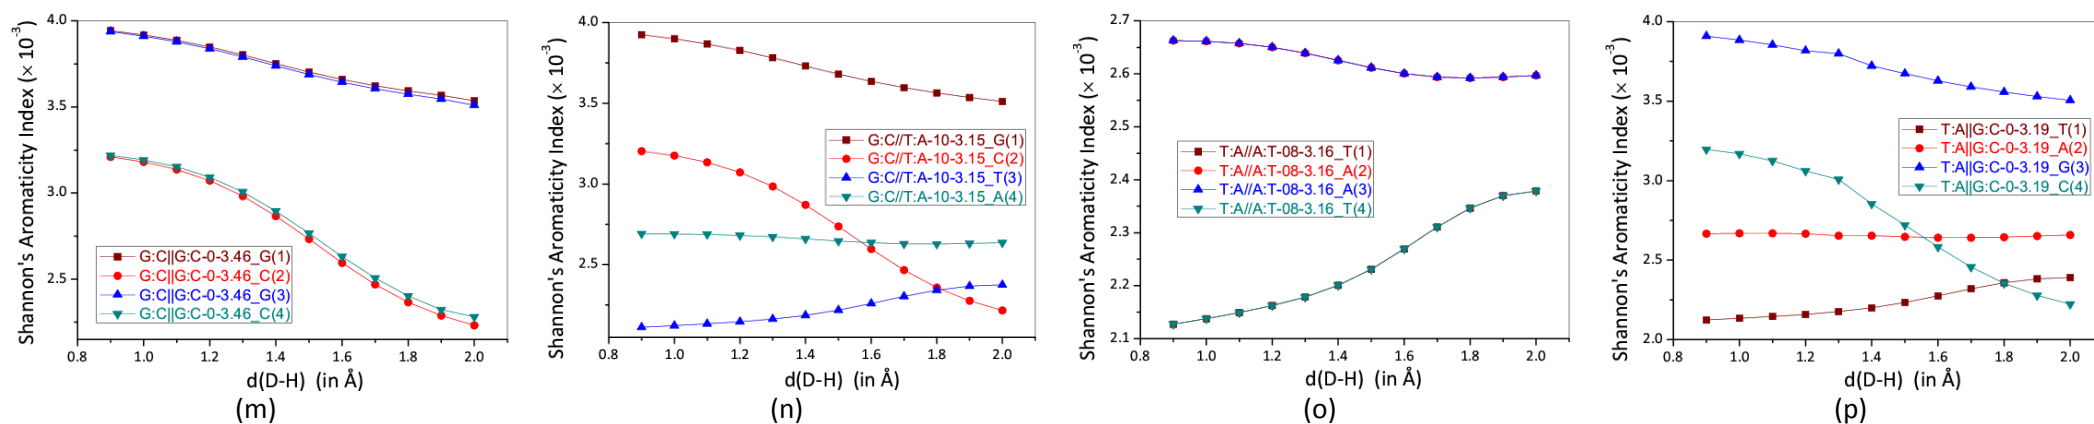

**Table S1.** A:T || A:T-0-3.24 Energy terms in *kcal/mol* and the transferred charges in *e* units. Percentages of the relevant energy components were italicized.

| d(D-H) | GD     | %GD          | FRZ*   | %FRZ*       | POL    | %POL         | CT     | %CT          | $E_{\text{interaction}}$ | Upward CT | Downward CT | —CT, —FRZ, —POL, —GD, — $E_{\text{int}}$ |
|--------|--------|--------------|--------|-------------|--------|--------------|--------|--------------|--------------------------|-----------|-------------|------------------------------------------|
| 0.9    | -1.196 | <i>10.68</i> | 0.404  | -3.60       | -1.599 | <i>14.28</i> | -8.808 | <i>78.65</i> | -11.200                  | 1.999     | 1.474       |                                          |
| 1.0    | -1.333 | <i>11.59</i> | 0.243  | -2.11       | -1.576 | <i>13.70</i> | -8.838 | <i>76.82</i> | -11.505                  | 2.026     | 1.481       |                                          |
| 1.1    | -1.458 | <i>12.38</i> | 0.091  | -0.78       | -1.549 | <i>13.15</i> | -8.864 | <i>75.25</i> | -11.780                  | 2.052     | 1.488       |                                          |
| 1.2    | -1.558 | <i>12.97</i> | -0.034 | <i>0.28</i> | -1.524 | <i>12.68</i> | -8.902 | <i>74.07</i> | -12.019                  | 2.081     | 1.496       |                                          |
| 1.3    | -1.602 | <i>13.15</i> | -0.096 | <i>0.78</i> | -1.506 | <i>12.37</i> | -8.976 | <i>73.70</i> | -12.179                  | 2.112     | 1.500       |                                          |
| 1.4    | -1.592 | <i>13.00</i> | -0.095 | <i>0.78</i> | -1.496 | <i>12.22</i> | -9.062 | <i>74.00</i> | -12.246                  | 2.145     | 1.497       |                                          |
| 1.5    | -1.540 | <i>12.60</i> | -0.038 | <i>0.31</i> | -1.502 | <i>12.29</i> | -9.137 | <i>74.79</i> | -12.217                  | 2.187     | 1.493       |                                          |
| 1.6    | -1.472 | <i>12.17</i> | 0.043  | -0.36       | -1.515 | <i>12.53</i> | -9.149 | <i>75.66</i> | -12.092                  | 2.233     | 1.484       |                                          |
| 1.7    | -1.389 | <i>11.70</i> | 0.154  | -1.29       | -1.543 | <i>12.99</i> | -9.097 | <i>76.60</i> | -11.875                  | 2.273     | 1.469       |                                          |
| 1.8    | -1.254 | <i>10.85</i> | 0.323  | -2.80       | -1.578 | <i>13.65</i> | -9.050 | <i>78.30</i> | -11.559                  | 2.307     | 1.456       |                                          |
| 1.9    | -1.089 | <i>9.72</i>  | 0.534  | -4.77       | -1.622 | <i>14.48</i> | -9.020 | <i>80.56</i> | -11.197                  | 2.331     | 1.441       |                                          |
| 2.0    | -0.892 | <i>8.25</i>  | 0.777  | -7.18       | -1.668 | <i>15.43</i> | -9.030 | <i>83.50</i> | -10.814                  | 2.341     | 1.427       |                                          |

\* Positive values of FRZ component are due to predominance of the repulsive exchange interactions appearing at small rise parameters below 3.3 Å with zero twist angle. FRZ term includes two nonseparable contributions: permanent electrostatics interactions and Pauli repulsions as in ref (56).

**Table S2.** A:T||A:T-0-3.34 Energy terms in *kcal/mol* and the transferred charges in *e* units. Percentages of the relevant energy components were italicized.

| d(D-H) | GD     | %GD          | FRZ    | %FRZ         | POL    | %POL         | CT     | %CT          | $E_{\text{interaction}}$ | Upward CT | Downward CT | —CT, —FRZ, —POL, —GD, —E_int |
|--------|--------|--------------|--------|--------------|--------|--------------|--------|--------------|--------------------------|-----------|-------------|------------------------------|
| 0.9    | -2.923 | <i>23.79</i> | -1.515 | <i>12.33</i> | -1.407 | <i>11.45</i> | -6.442 | <i>52.43</i> | -12.287                  | 1.504     | 1.138       |                              |
| 1.0    | -3.056 | <i>24.33</i> | -1.670 | <i>13.29</i> | -1.386 | <i>11.03</i> | -6.451 | <i>51.35</i> | -12.564                  | 1.522     | 1.146       |                              |
| 1.1    | -3.193 | <i>24.87</i> | -1.829 | <i>14.25</i> | -1.364 | <i>10.62</i> | -6.453 | <i>50.26</i> | -12.838                  | 1.541     | 1.152       |                              |
| 1.2    | -3.308 | <i>25.28</i> | -1.965 | <i>15.02</i> | -1.343 | <i>10.27</i> | -6.467 | <i>49.43</i> | -13.082                  | 1.563     | 1.158       |                              |
| 1.3    | -3.360 | <i>25.38</i> | -2.033 | <i>15.35</i> | -1.328 | <i>10.03</i> | -6.520 | <i>49.24</i> | -13.241                  | 1.585     | 1.162       |                              |
| 1.4    | -3.354 | <i>25.21</i> | -2.036 | <i>15.30</i> | -1.318 | <i>9.90</i>  | -6.597 | <i>49.58</i> | -13.306                  | 1.613     | 1.163       |                              |
| 1.5    | -3.305 | <i>24.89</i> | -1.985 | <i>14.95</i> | -1.320 | <i>9.94</i>  | -6.668 | <i>50.22</i> | -13.279                  | 1.648     | 1.163       |                              |
| 1.6    | -3.246 | <i>24.64</i> | -1.914 | <i>14.53</i> | -1.332 | <i>10.11</i> | -6.681 | <i>50.72</i> | -13.172                  | 1.683     | 1.159       |                              |
| 1.7    | -3.165 | <i>24.40</i> | -1.810 | <i>13.95</i> | -1.355 | <i>10.45</i> | -6.641 | <i>51.20</i> | -12.971                  | 1.710     | 1.148       |                              |
| 1.8    | -3.045 | <i>24.00</i> | -1.660 | <i>13.08</i> | -1.385 | <i>10.92</i> | -6.595 | <i>51.99</i> | -12.686                  | 1.727     | 1.134       |                              |
| 1.9    | -2.889 | <i>23.38</i> | -1.467 | <i>11.87</i> | -1.422 | <i>11.51</i> | -6.579 | <i>53.24</i> | -12.357                  | 1.745     | 1.124       |                              |
| 2.0    | -2.698 | <i>22.49</i> | -1.234 | <i>10.28</i> | -1.464 | <i>12.20</i> | -6.602 | <i>55.03</i> | -11.998                  | 1.764     | 1.114       |                              |

**Table S3.** A:T||A:T-0-3.44 Energy terms in *kcal/mol* and the transferred charges in *e* units. Percentages of the relevant energy components were italicized.

| d(D-H) | GD     | %GD          | FRZ    | %FRZ         | POL    | %POL         | CT     | %CT          | $E_{\text{interaction}}$ | Upward CT | Downward CT | —CT, —FRZ, —POL, —GD, —E_int |
|--------|--------|--------------|--------|--------------|--------|--------------|--------|--------------|--------------------------|-----------|-------------|------------------------------|
| 0.9    | -4.302 | <i>33.58</i> | -3.061 | <i>23.90</i> | -1.240 | <i>9.68</i>  | -4.208 | <i>32.85</i> | -12.812                  | 1.125     | 0.865       |                              |
| 1.0    | -4.428 | <i>33.89</i> | -3.205 | <i>24.53</i> | -1.223 | <i>9.36</i>  | -4.210 | <i>32.22</i> | -13.066                  | 1.138     | 0.873       |                              |
| 1.1    | -4.544 | <i>34.17</i> | -3.342 | <i>25.13</i> | -1.202 | <i>9.04</i>  | -4.212 | <i>31.67</i> | -13.300                  | 1.153     | 0.881       |                              |
| 1.2    | -4.633 | <i>34.34</i> | -3.454 | <i>25.60</i> | -1.179 | <i>8.74</i>  | -4.225 | <i>31.32</i> | -13.491                  | 1.177     | 0.900       |                              |
| 1.3    | -4.692 | <i>34.43</i> | -3.522 | <i>25.85</i> | -1.170 | <i>8.58</i>  | -4.243 | <i>31.14</i> | -13.627                  | 1.186     | 0.892       |                              |
| 1.4    | -4.701 | <i>34.34</i> | -3.539 | <i>25.86</i> | -1.162 | <i>8.49</i>  | -4.286 | <i>31.31</i> | -13.688                  | 1.212     | 0.896       |                              |
| 1.5    | -4.667 | <i>34.15</i> | -3.505 | <i>25.65</i> | -1.162 | <i>8.50</i>  | -4.333 | <i>31.70</i> | -13.667                  | 1.239     | 0.898       |                              |
| 1.6    | -4.614 | <i>33.99</i> | -3.443 | <i>25.36</i> | -1.172 | <i>8.63</i>  | -4.347 | <i>32.02</i> | -13.576                  | 1.261     | 0.895       |                              |
| 1.7    | -4.517 | <i>33.74</i> | -3.328 | <i>24.86</i> | -1.189 | <i>8.88</i>  | -4.352 | <i>32.51</i> | -13.387                  | 1.278     | 0.887       |                              |
| 1.8    | -4.383 | <i>33.41</i> | -3.169 | <i>24.15</i> | -1.214 | <i>9.26</i>  | -4.354 | <i>33.18</i> | -13.121                  | 1.294     | 0.878       |                              |
| 1.9    | -4.224 | <i>32.99</i> | -2.979 | <i>23.26</i> | -1.245 | <i>9.72</i>  | -4.357 | <i>34.02</i> | -12.805                  | 1.309     | 0.869       |                              |
| 2.0    | -4.053 | <i>32.51</i> | -2.773 | <i>22.25</i> | -1.280 | <i>10.27</i> | -4.360 | <i>34.98</i> | -12.466                  | 1.319     | 0.857       |                              |

**Table S4.** A:T||A:T-20-3.05 Energy terms in *kcal/mol* and the transferred charges in *e* units. Percentages of the relevant energy components were italicized.

| d(D-H) | GD     | %GD          | FRZ    | %FRZ         | POL    | %POL         | CT    | %CT          | $E_{\text{interaction}}$ | Upward CT | Downward CT | —CT, —FRZ, —POL, —GD, —E_int |
|--------|--------|--------------|--------|--------------|--------|--------------|-------|--------------|--------------------------|-----------|-------------|------------------------------|
| 0.9    | -2.744 | <i>19.72</i> | -0.945 | <i>6.79</i>  | -1.799 | <i>12.93</i> | -8.43 | <i>60.56</i> | -13.913                  | 1.546     | 1.846       |                              |
| 1.0    | -2.943 | <i>20.38</i> | -1.157 | <i>8.01</i>  | -1.786 | <i>12.37</i> | -8.55 | <i>59.24</i> | -14.440                  | 1.613     | 1.867       |                              |
| 1.1    | -3.144 | <i>20.95</i> | -1.366 | <i>9.10</i>  | -1.778 | <i>11.85</i> | -8.72 | <i>58.09</i> | -15.005                  | 1.707     | 1.897       |                              |
| 1.2    | -3.325 | <i>21.41</i> | -1.548 | <i>9.97</i>  | -1.777 | <i>11.44</i> | -8.88 | <i>57.19</i> | -15.535                  | 1.824     | 1.927       |                              |
| 1.3    | -3.476 | <i>21.74</i> | -1.689 | <i>10.56</i> | -1.787 | <i>11.18</i> | -9.04 | <i>56.51</i> | -15.989                  | 1.951     | 1.954       |                              |
| 1.4    | -3.554 | <i>21.81</i> | -1.746 | <i>10.72</i> | -1.808 | <i>11.09</i> | -9.19 | <i>56.38</i> | -16.296                  | 2.086     | 1.971       |                              |
| 1.5    | -3.584 | <i>21.74</i> | -1.747 | <i>10.59</i> | -1.838 | <i>11.15</i> | -9.32 | <i>56.52</i> | -16.489                  | 2.225     | 1.982       |                              |
| 1.6    | -3.603 | <i>21.71</i> | -1.725 | <i>10.40</i> | -1.878 | <i>11.32</i> | -9.39 | <i>56.57</i> | -16.593                  | 2.350     | 1.983       |                              |
| 1.7    | -3.559 | <i>21.52</i> | -1.629 | <i>9.85</i>  | -1.930 | <i>11.67</i> | -9.42 | <i>56.97</i> | -16.543                  | 2.448     | 1.975       |                              |
| 1.8    | -3.452 | <i>21.12</i> | -1.467 | <i>8.97</i>  | -1.985 | <i>12.14</i> | -9.44 | <i>57.77</i> | -16.349                  | 2.508     | 1.963       |                              |
| 1.9    | -3.335 | <i>20.75</i> | -1.296 | <i>8.06</i>  | -2.039 | <i>12.69</i> | -9.40 | <i>58.49</i> | -16.069                  | 2.510     | 1.952       |                              |
| 2.0    | -3.207 | <i>20.40</i> | -1.119 | <i>7.12</i>  | -2.087 | <i>13.28</i> | -9.30 | <i>59.20</i> | -15.718                  | 2.468     | 1.941       |                              |

**Table S5.** A:T||A:T-20-3.15 Energy terms in *kcal/mol* and the transferred charges in *e* units. Percentages of the relevant energy components were italicized.

| d(D-H) | GD     | %GD          | FRZ    | %FRZ         | POL    | %POL         | CT     | %CT          | $E_{\text{interaction}}$ | Upward CT | Downward CT | —CT, —FRZ, —POL, —GD, —E_int |
|--------|--------|--------------|--------|--------------|--------|--------------|--------|--------------|--------------------------|-----------|-------------|------------------------------|
| 0.9    | -4.420 | <i>29.72</i> | -2.852 | <i>19.18</i> | -1.568 | <i>10.55</i> | -6.032 | <i>40.56</i> | -14.872                  | 1.158     | 1.424       |                              |
| 1.0    | -4.598 | <i>29.93</i> | -3.038 | <i>19.78</i> | -1.560 | <i>10.16</i> | -6.164 | <i>40.13</i> | -15.361                  | 1.221     | 1.447       |                              |
| 1.1    | -4.789 | <i>30.14</i> | -3.236 | <i>20.37</i> | -1.553 | <i>9.77</i>  | -6.312 | <i>39.72</i> | -15.890                  | 1.301     | 1.468       |                              |
| 1.2    | -4.974 | <i>30.33</i> | -3.423 | <i>20.88</i> | -1.551 | <i>9.46</i>  | -6.450 | <i>39.34</i> | -16.397                  | 1.399     | 1.489       |                              |
| 1.3    | -5.131 | <i>30.49</i> | -3.572 | <i>21.23</i> | -1.558 | <i>9.26</i>  | -6.565 | <i>39.02</i> | -16.827                  | 1.505     | 1.509       |                              |
| 1.4    | -5.245 | <i>30.56</i> | -3.670 | <i>21.39</i> | -1.574 | <i>9.17</i>  | -6.672 | <i>38.88</i> | -17.162                  | 1.616     | 1.521       |                              |
| 1.5    | -5.309 | <i>30.55</i> | -3.704 | <i>21.31</i> | -1.605 | <i>9.24</i>  | -6.762 | <i>38.91</i> | -17.379                  | 1.736     | 1.526       |                              |
| 1.6    | -5.326 | <i>30.50</i> | -3.683 | <i>21.09</i> | -1.643 | <i>9.41</i>  | -6.812 | <i>39.00</i> | -17.465                  | 1.845     | 1.526       |                              |
| 1.7    | -5.293 | <i>30.37</i> | -3.607 | <i>20.70</i> | -1.686 | <i>9.68</i>  | -6.841 | <i>39.26</i> | -17.426                  | 1.921     | 1.517       |                              |
| 1.8    | -5.200 | <i>30.13</i> | -3.471 | <i>20.11</i> | -1.729 | <i>10.02</i> | -6.860 | <i>39.75</i> | -17.260                  | 1.974     | 1.502       |                              |
| 1.9    | -5.085 | <i>29.90</i> | -3.316 | <i>19.50</i> | -1.769 | <i>10.40</i> | -6.835 | <i>40.19</i> | -17.006                  | 1.980     | 1.484       |                              |
| 2.0    | -4.959 | <i>29.69</i> | -3.146 | <i>18.84</i> | -1.813 | <i>10.85</i> | -6.782 | <i>40.61</i> | -16.699                  | 1.946     | 1.471       |                              |

**Table S6.** A:T||A:T-20-3.25 Energy terms in *kcal/mol* and the transferred charges in *e* units. Percentages of the relevant energy components were italicized.

| d(D-H) | GD     | %GD   | FRZ    | %FRZ  | POL    | %POL | CT     | %CT   | $E_{\text{interaction}}$ | Upward CT | Downward CT | —CT, —FRZ, —POL, —GD, —E_int |
|--------|--------|-------|--------|-------|--------|------|--------|-------|--------------------------|-----------|-------------|------------------------------|
| 0.9    | -5.182 | 35.59 | -3.842 | 26.39 | -1.340 | 9.20 | -4.196 | 28.82 | -14.561                  | 0.850     | 1.090       |                              |
| 1.0    | -5.367 | 35.68 | -4.035 | 26.82 | -1.333 | 8.86 | -4.307 | 28.63 | -15.042                  | 0.904     | 1.107       |                              |
| 1.1    | -5.550 | 35.77 | -4.224 | 27.22 | -1.326 | 8.55 | -4.417 | 28.46 | -15.517                  | 0.974     | 1.125       |                              |
| 1.2    | -5.739 | 35.89 | -4.413 | 27.60 | -1.326 | 8.29 | -4.512 | 28.22 | -15.989                  | 1.052     | 1.143       |                              |
| 1.3    | -5.917 | 36.02 | -4.583 | 27.90 | -1.334 | 8.12 | -4.593 | 27.96 | -16.427                  | 1.139     | 1.158       |                              |
| 1.4    | -6.050 | 36.09 | -4.700 | 28.03 | -1.351 | 8.06 | -4.663 | 27.82 | -16.763                  | 1.235     | 1.168       |                              |
| 1.5    | -6.127 | 36.09 | -4.752 | 27.99 | -1.376 | 8.10 | -4.721 | 27.81 | -16.975                  | 1.335     | 1.171       |                              |
| 1.6    | -6.157 | 36.07 | -4.751 | 27.83 | -1.406 | 8.24 | -4.756 | 27.86 | -17.070                  | 1.423     | 1.164       |                              |
| 1.7    | -6.112 | 35.93 | -4.669 | 27.44 | -1.444 | 8.49 | -4.789 | 28.15 | -17.014                  | 1.491     | 1.150       |                              |
| 1.8    | -6.031 | 35.75 | -4.547 | 26.96 | -1.483 | 8.79 | -4.807 | 28.50 | -16.869                  | 1.540     | 1.137       |                              |
| 1.9    | -5.939 | 35.61 | -4.419 | 26.50 | -1.520 | 9.12 | -4.798 | 28.77 | -16.675                  | 1.549     | 1.124       |                              |
| 2.0    | -5.814 | 35.43 | -4.262 | 25.97 | -1.552 | 9.46 | -4.782 | 29.14 | -16.410                  | 1.527     | 1.107       |                              |

**Table S7.** A:T//G:C-08-3.19 Energy terms in *kcal/mol* and the transferred charges in *e* units. Percentages of the relevant energy components were italicized.

| d(D-H) | GD     | %GD   | FRZ    | %FRZ  | POL    | %POL  | CT     | %CT   | $E_{\text{interaction}}$ | Upward CT | Downward CT | —CT, —FRZ, —POL, —GD, —E_int |
|--------|--------|-------|--------|-------|--------|-------|--------|-------|--------------------------|-----------|-------------|------------------------------|
| 0.9    | -3.739 | 28.82 | -2.103 | 16.21 | -1.636 | 12.61 | -5.496 | 42.36 | -12.974                  | 1.142     | 1.245       |                              |
| 1.0    | -3.746 | 28.76 | -2.119 | 16.27 | -1.627 | 12.49 | -5.535 | 42.49 | -13.026                  | 1.136     | 1.262       |                              |
| 1.1    | -3.736 | 28.63 | -2.114 | 16.20 | -1.622 | 12.43 | -5.578 | 42.75 | -13.050                  | 1.127     | 1.279       |                              |
| 1.2    | -3.739 | 28.57 | -2.116 | 16.16 | -1.623 | 12.40 | -5.611 | 42.87 | -13.089                  | 1.116     | 1.299       |                              |
| 1.3    | -3.726 | 28.46 | -2.099 | 16.03 | -1.628 | 12.43 | -5.640 | 43.08 | -13.093                  | 1.104     | 1.315       |                              |
| 1.4    | -3.676 | 28.24 | -2.039 | 15.66 | -1.637 | 12.58 | -5.664 | 43.52 | -13.016                  | 1.089     | 1.328       |                              |
| 1.5    | -3.597 | 28.00 | -1.940 | 15.10 | -1.657 | 12.90 | -5.654 | 44.01 | -12.848                  | 1.070     | 1.332       |                              |
| 1.6    | -3.475 | 27.63 | -1.795 | 14.27 | -1.680 | 13.36 | -5.627 | 44.74 | -12.577                  | 1.049     | 1.325       |                              |
| 1.7    | -3.293 | 27.04 | -1.588 | 13.04 | -1.705 | 14.00 | -5.591 | 45.92 | -12.176                  | 1.025     | 1.309       |                              |
| 1.8    | -3.081 | 26.34 | -1.353 | 11.57 | -1.728 | 14.77 | -5.536 | 47.32 | -11.699                  | 1.001     | 1.283       |                              |
| 1.9    | -2.836 | 25.46 | -1.086 | 9.75  | -1.751 | 15.72 | -5.467 | 49.08 | -11.140                  | 0.975     | 1.243       |                              |
| 2.0    | -2.539 | 24.24 | -0.775 | 7.40  | -1.764 | 16.84 | -5.396 | 51.52 | -10.474                  | 0.946     | 1.195       |                              |



**Table S8.** A:T//T:A-10-3.26 Energy terms in *kcal/mol* and the transferred charges in *e* units. Percentages of the relevant energy components were italicized.

| d(D-H) | GD     | %GD          | FRZ    | %FRZ        | POL    | %POL         | CT     | %CT          | $E_{\text{interaction}}$ | Upward CT | Downward CT | —CT, —FRZ, —POL, —GD, —E_int |
|--------|--------|--------------|--------|-------------|--------|--------------|--------|--------------|--------------------------|-----------|-------------|------------------------------|
| 0.9    | -2.788 | <i>22.67</i> | -1.196 | <i>9.73</i> | -1.592 | <i>12.94</i> | -6.725 | <i>54.67</i> | -12.301                  | 1.471     | 1.471       |                              |
| 1.0    | -2.721 | <i>22.30</i> | -1.146 | <i>9.39</i> | -1.575 | <i>12.90</i> | -6.761 | <i>55.40</i> | -12.203                  | 1.475     | 1.475       |                              |
| 1.1    | -2.592 | <i>21.59</i> | -1.036 | <i>8.63</i> | -1.556 | <i>12.96</i> | -6.823 | <i>56.82</i> | -12.008                  | 1.483     | 1.483       |                              |
| 1.2    | -2.427 | <i>20.66</i> | -0.886 | <i>7.54</i> | -1.541 | <i>13.11</i> | -6.894 | <i>58.68</i> | -11.748                  | 1.499     | 1.499       |                              |
| 1.3    | -2.259 | <i>19.71</i> | -0.728 | <i>6.36</i> | -1.530 | <i>13.35</i> | -6.943 | <i>60.58</i> | -11.460                  | 1.511     | 1.511       |                              |
| 1.4    | -2.137 | <i>19.01</i> | -0.603 | <i>5.36</i> | -1.534 | <i>13.65</i> | -6.966 | <i>61.97</i> | -11.240                  | 1.524     | 1.524       |                              |
| 1.5    | -2.071 | <i>18.62</i> | -0.517 | <i>4.65</i> | -1.553 | <i>13.97</i> | -6.978 | <i>62.75</i> | -11.119                  | 1.545     | 1.545       |                              |
| 1.6    | -2.031 | <i>18.36</i> | -0.432 | <i>3.90</i> | -1.599 | <i>14.45</i> | -7.000 | <i>63.28</i> | -11.061                  | 1.563     | 1.563       |                              |
| 1.7    | -2.010 | <i>18.16</i> | -0.357 | <i>3.23</i> | -1.653 | <i>14.93</i> | -7.052 | <i>63.69</i> | -11.073                  | 1.576     | 1.575       |                              |
| 1.8    | -2.046 | <i>18.33</i> | -0.332 | <i>2.98</i> | -1.714 | <i>15.35</i> | -7.070 | <i>63.34</i> | -11.162                  | 1.582     | 1.582       |                              |
| 1.9    | -2.110 | <i>18.72</i> | -0.329 | <i>2.92</i> | -1.781 | <i>15.81</i> | -7.050 | <i>62.56</i> | -11.271                  | 1.573     | 1.573       |                              |
| 2.0    | -2.162 | <i>19.03</i> | -0.305 | <i>2.69</i> | -1.857 | <i>16.35</i> | -7.035 | <i>61.93</i> | -11.359                  | 1.555     | 1.555       |                              |

**Table S9.** G:C//A:T-10-3.15 Energy terms in *kcal/mol* and the transferred charges in *e* units. Percentages of the relevant energy components were italicized.

| d(D-H) | GD     | %GD          | FRZ    | %FRZ         | POL    | %POL         | CT     | %CT          | $E_{\text{interaction}}$ | Upward CT | Downward CT | —CT, —FRZ, —POL, —GD, —E_int |
|--------|--------|--------------|--------|--------------|--------|--------------|--------|--------------|--------------------------|-----------|-------------|------------------------------|
| 0.9    | -2.198 | <i>19.58</i> | -0.477 | <i>4.25</i>  | -1.721 | <i>15.33</i> | -6.829 | <i>60.84</i> | -11.224                  | 1.359     | 0.854       |                              |
| 1.0    | -2.439 | <i>20.70</i> | -0.738 | <i>6.27</i>  | -1.701 | <i>14.43</i> | -6.905 | <i>58.60</i> | -11.783                  | 1.396     | 0.874       |                              |
| 1.1    | -2.689 | <i>21.74</i> | -1.014 | <i>8.20</i>  | -1.675 | <i>13.54</i> | -6.988 | <i>56.51</i> | -12.365                  | 1.437     | 0.899       |                              |
| 1.2    | -2.949 | <i>22.76</i> | -1.296 | <i>10.00</i> | -1.653 | <i>12.76</i> | -7.061 | <i>54.49</i> | -12.959                  | 1.473     | 0.927       |                              |
| 1.3    | -3.192 | <i>23.60</i> | -1.560 | <i>11.54</i> | -1.632 | <i>12.07</i> | -7.139 | <i>52.79</i> | -13.523                  | 1.505     | 0.959       |                              |
| 1.4    | -3.439 | <i>24.37</i> | -1.822 | <i>12.91</i> | -1.617 | <i>11.46</i> | -7.232 | <i>51.26</i> | -14.109                  | 1.538     | 0.998       |                              |
| 1.5    | -3.685 | <i>25.08</i> | -2.079 | <i>14.16</i> | -1.606 | <i>10.93</i> | -7.320 | <i>49.83</i> | -14.690                  | 1.564     | 1.038       |                              |
| 1.6    | -3.918 | <i>25.73</i> | -2.316 | <i>15.21</i> | -1.603 | <i>10.52</i> | -7.393 | <i>48.54</i> | -15.229                  | 1.574     | 1.075       |                              |
| 1.7    | -4.111 | <i>26.24</i> | -2.507 | <i>16.00</i> | -1.604 | <i>10.24</i> | -7.445 | <i>47.52</i> | -15.667                  | 1.566     | 1.109       |                              |
| 1.8    | -4.253 | <i>26.62</i> | -2.646 | <i>16.56</i> | -1.608 | <i>10.06</i> | -7.474 | <i>46.77</i> | -15.981                  | 1.550     | 1.144       |                              |
| 1.9    | -4.330 | <i>26.81</i> | -2.715 | <i>16.81</i> | -1.616 | <i>10.00</i> | -7.489 | <i>46.37</i> | -16.150                  | 1.526     | 1.175       |                              |
| 2.0    | -4.362 | <i>26.91</i> | -2.734 | <i>16.87</i> | -1.628 | <i>10.05</i> | -7.484 | <i>46.17</i> | -16.208                  | 1.500     | 1.200       |                              |

**Table S10.** G:C//C:G-0-3.25 Energy terms in *kcal/mol* and the transferred charges in *e* units. Percentages of the relevant energy components were italicized.

| d(D-H) | GD     | %GD          | FRZ    | %FRZ         | POL    | %POL         | CT     | %CT          | $E_{\text{interaction}}$ | Upward CT | Downward CT | —CT, —FRZ, —POL, —GD, —E_int |
|--------|--------|--------------|--------|--------------|--------|--------------|--------|--------------|--------------------------|-----------|-------------|------------------------------|
| 0.9    | -3.774 | <i>24.64</i> | -1.654 | <i>10.79</i> | -2.121 | <i>13.84</i> | -7.772 | <i>50.73</i> | -15.321                  | 1.009     | 1.009       |                              |
| 1.0    | -3.743 | <i>24.41</i> | -1.644 | <i>10.72</i> | -2.100 | <i>13.69</i> | -7.850 | <i>51.18</i> | -15.337                  | 1.013     | 1.013       |                              |
| 1.1    | -3.703 | <i>24.17</i> | -1.624 | <i>10.60</i> | -2.080 | <i>13.57</i> | -7.915 | <i>51.66</i> | -15.322                  | 1.015     | 1.015       |                              |
| 1.2    | -3.641 | <i>23.86</i> | -1.582 | <i>10.37</i> | -2.059 | <i>13.49</i> | -7.976 | <i>52.28</i> | -15.258                  | 1.019     | 1.019       |                              |
| 1.3    | -3.582 | <i>23.61</i> | -1.538 | <i>10.14</i> | -2.044 | <i>13.47</i> | -8.010 | <i>52.78</i> | -15.174                  | 1.024     | 1.024       |                              |
| 1.4    | -3.561 | <i>23.53</i> | -1.521 | <i>10.05</i> | -2.041 | <i>13.48</i> | -8.010 | <i>52.93</i> | -15.133                  | 1.028     | 1.028       |                              |
| 1.5    | -3.576 | <i>23.59</i> | -1.526 | <i>10.07</i> | -2.050 | <i>13.52</i> | -8.009 | <i>52.83</i> | -15.162                  | 1.034     | 1.034       |                              |
| 1.6    | -3.586 | <i>23.54</i> | -1.534 | <i>10.07</i> | -2.052 | <i>13.47</i> | -8.062 | <i>52.92</i> | -15.233                  | 1.040     | 1.040       |                              |
| 1.7    | -3.628 | <i>23.61</i> | -1.575 | <i>10.25</i> | -2.053 | <i>13.36</i> | -8.108 | <i>52.77</i> | -15.363                  | 1.044     | 1.044       |                              |
| 1.8    | -3.668 | <i>23.71</i> | -1.610 | <i>10.41</i> | -2.057 | <i>13.30</i> | -8.134 | <i>52.58</i> | -15.469                  | 1.041     | 1.041       |                              |
| 1.9    | -3.690 | <i>23.78</i> | -1.626 | <i>10.48</i> | -2.064 | <i>13.30</i> | -8.137 | <i>52.44</i> | -15.517                  | 1.041     | 1.041       |                              |
| 2.0    | -3.735 | <i>24.01</i> | -1.655 | <i>10.64</i> | -2.080 | <i>13.37</i> | -8.085 | <i>51.97</i> | -15.556                  | 1.047     | 1.047       |                              |

**Table S11.** G:C//G:C-0-3.26 Energy terms in *kcal/mol* and the transferred charges in *e* units. Percentages of the relevant energy components were italicized.

| d(D-H) | GD     | %GD          | FRZ*   | %FRZ*         | POL    | %POL         | CT     | %CT          | $E_{\text{interaction}}$ | Upward CT | Downward CT | —CT, —FRZ, —POL, —GD, —E_int |
|--------|--------|--------------|--------|---------------|--------|--------------|--------|--------------|--------------------------|-----------|-------------|------------------------------|
| 0.9    | -0.642 | <i>7.90</i>  | 1.089  | <i>-13.40</i> | -1.731 | <i>21.30</i> | -6.843 | <i>84.20</i> | -8.127                   | 1.077     | 1.073       |                              |
| 1.0    | -0.803 | <i>9.46</i>  | 0.916  | <i>-10.80</i> | -1.719 | <i>20.26</i> | -6.881 | <i>81.08</i> | -8.486                   | 1.082     | 1.077       |                              |
| 1.1    | -0.964 | <i>10.92</i> | 0.743  | <i>-8.41</i>  | -1.707 | <i>19.33</i> | -6.900 | <i>78.16</i> | -8.828                   | 1.078     | 1.081       |                              |
| 1.2    | -1.132 | <i>12.35</i> | 0.557  | <i>-6.08</i>  | -1.690 | <i>18.42</i> | -6.907 | <i>75.31</i> | -9.172                   | 1.069     | 1.089       |                              |
| 1.3    | -1.313 | <i>13.79</i> | 0.361  | <i>-3.79</i>  | -1.674 | <i>17.57</i> | -6.899 | <i>72.43</i> | -9.525                   | 1.054     | 1.100       |                              |
| 1.4    | -1.479 | <i>15.02</i> | 0.181  | <i>-1.84</i>  | -1.660 | <i>16.85</i> | -6.892 | <i>69.97</i> | -9.850                   | 1.032     | 1.116       |                              |
| 1.5    | -1.602 | <i>15.88</i> | 0.047  | <i>-0.46</i>  | -1.649 | <i>16.35</i> | -6.883 | <i>68.23</i> | -10.088                  | 1.004     | 1.129       |                              |
| 1.6    | -1.680 | <i>16.38</i> | -0.040 | <i>0.39</i>   | -1.641 | <i>16.00</i> | -6.895 | <i>67.23</i> | -10.256                  | 0.971     | 1.141       |                              |
| 1.7    | -1.702 | <i>16.51</i> | -0.058 | <i>0.56</i>   | -1.645 | <i>15.95</i> | -6.910 | <i>66.99</i> | -10.314                  | 0.943     | 1.154       |                              |
| 1.8    | -1.679 | <i>16.36</i> | -0.026 | <i>0.25</i>   | -1.652 | <i>16.10</i> | -6.903 | <i>67.28</i> | -10.260                  | 0.921     | 1.167       |                              |
| 1.9    | -1.626 | <i>16.04</i> | 0.035  | <i>-0.34</i>  | -1.661 | <i>16.38</i> | -6.888 | <i>67.92</i> | -10.141                  | 0.901     | 1.177       |                              |
| 2.0    | -1.544 | <i>15.50</i> | 0.127  | <i>-1.28</i>  | -1.672 | <i>16.78</i> | -6.876 | <i>69.00</i> | -9.964                   | 0.884     | 1.183       |                              |

\* Positive values of FRZ component are due to predominance of the repulsive exchange interactions appearing at small rise parameters below 3.3 Å with zero twist angle. FRZ term includes two nonseparable contributions: permanent electrostatics interactions and Pauli repulsions as in ref (56).



**Table S12.** G:C//G:C-0-3.36 Energy terms in *kcal/mol* and the transferred charges in *e* units. Percentages of the relevant energy components were italicized.

| d(D-H) | GD     | %GD          | FRZ    | %FRZ         | POL    | %POL         | CT     | %CT          | $E_{\text{interaction}}$ | Upward CT | Downward CT | —CT, —FRZ, —POL, —GD, —E_int |
|--------|--------|--------------|--------|--------------|--------|--------------|--------|--------------|--------------------------|-----------|-------------|------------------------------|
| 0.9    | -1.936 | <i>22.31</i> | -0.387 | <i>4.46</i>  | -1.549 | <i>17.85</i> | -4.807 | <i>55.38</i> | -8.679                   | 0.834     | 0.833       |                              |
| 1.0    | -2.090 | <i>23.19</i> | -0.552 | <i>6.13</i>  | -1.538 | <i>17.07</i> | -4.830 | <i>53.61</i> | -9.009                   | 0.838     | 0.837       |                              |
| 1.1    | -2.245 | <i>24.07</i> | -0.720 | <i>7.72</i>  | -1.525 | <i>16.35</i> | -4.839 | <i>51.87</i> | -9.329                   | 0.835     | 0.841       |                              |
| 1.2    | -2.413 | <i>25.01</i> | -0.901 | <i>9.34</i>  | -1.513 | <i>15.68</i> | -4.821 | <i>49.97</i> | -9.648                   | 0.828     | 0.846       |                              |
| 1.3    | -2.595 | <i>26.01</i> | -1.097 | <i>10.99</i> | -1.498 | <i>15.02</i> | -4.787 | <i>47.98</i> | -9.977                   | 0.816     | 0.852       |                              |
| 1.4    | -2.755 | <i>26.81</i> | -1.267 | <i>12.33</i> | -1.488 | <i>14.48</i> | -4.766 | <i>46.38</i> | -10.277                  | 0.802     | 0.862       |                              |
| 1.5    | -2.869 | <i>27.32</i> | -1.391 | <i>13.25</i> | -1.478 | <i>14.07</i> | -4.763 | <i>45.36</i> | -10.500                  | 0.785     | 0.875       |                              |
| 1.6    | -2.940 | <i>27.58</i> | -1.468 | <i>13.77</i> | -1.472 | <i>13.81</i> | -4.780 | <i>44.84</i> | -10.661                  | 0.761     | 0.887       |                              |
| 1.7    | -2.955 | <i>27.59</i> | -1.481 | <i>13.82</i> | -1.474 | <i>13.76</i> | -4.802 | <i>44.83</i> | -10.712                  | 0.736     | 0.896       |                              |
| 1.8    | -2.922 | <i>27.40</i> | -1.443 | <i>13.53</i> | -1.479 | <i>13.87</i> | -4.822 | <i>45.20</i> | -10.666                  | 0.716     | 0.905       |                              |
| 1.9    | -2.874 | <i>27.17</i> | -1.391 | <i>13.14</i> | -1.484 | <i>14.02</i> | -4.831 | <i>45.66</i> | -10.580                  | 0.698     | 0.907       |                              |
| 2.0    | -2.793 | <i>26.78</i> | -1.305 | <i>12.51</i> | -1.488 | <i>14.27</i> | -4.845 | <i>46.45</i> | -10.431                  | 0.683     | 0.908       |                              |

**Table S13.** G:C//G:C-0-3.46 Energy terms in *kcal/mol* and the transferred charges in *e* units. Percentages of the relevant energy components were italicized.

| d(D-H) | GD     | %GD          | FRZ    | %FRZ         | POL    | %POL         | CT     | %CT          | $E_{\text{interaction}}$ | Upward CT | Downward CT | —CT, —FRZ, —POL, —GD, —E_int |
|--------|--------|--------------|--------|--------------|--------|--------------|--------|--------------|--------------------------|-----------|-------------|------------------------------|
| 0.9    | -2.895 | <i>32.55</i> | -1.541 | <i>17.33</i> | -1.354 | <i>15.23</i> | -3.103 | <i>34.89</i> | -8.894                   | 0.629     | 0.629       |                              |
| 1.0    | -3.021 | <i>32.92</i> | -1.679 | <i>18.29</i> | -1.342 | <i>14.63</i> | -3.136 | <i>34.17</i> | -9.178                   | 0.633     | 0.633       |                              |
| 1.1    | -3.139 | <i>33.26</i> | -1.808 | <i>19.16</i> | -1.331 | <i>14.10</i> | -3.159 | <i>33.48</i> | -9.436                   | 0.630     | 0.634       |                              |
| 1.2    | -3.258 | <i>33.60</i> | -1.940 | <i>20.01</i> | -1.318 | <i>13.59</i> | -3.181 | <i>32.80</i> | -9.698                   | 0.625     | 0.637       |                              |
| 1.3    | -3.391 | <i>33.96</i> | -2.085 | <i>20.89</i> | -1.306 | <i>13.08</i> | -3.202 | <i>32.07</i> | -9.984                   | 0.619     | 0.642       |                              |
| 1.4    | -3.515 | <i>34.30</i> | -2.223 | <i>21.70</i> | -1.292 | <i>12.61</i> | -3.216 | <i>31.39</i> | -10.246                  | 0.604     | 0.643       |                              |
| 1.5    | -3.610 | <i>34.59</i> | -2.328 | <i>22.31</i> | -1.282 | <i>12.29</i> | -3.215 | <i>30.81</i> | -10.435                  | 0.589     | 0.646       |                              |
| 1.6    | -3.682 | <i>34.81</i> | -2.406 | <i>22.75</i> | -1.276 | <i>12.06</i> | -3.214 | <i>30.38</i> | -10.578                  | 0.574     | 0.652       |                              |
| 1.7    | -3.704 | <i>34.87</i> | -2.429 | <i>22.87</i> | -1.275 | <i>12.01</i> | -3.214 | <i>30.26</i> | -10.621                  | 0.558     | 0.657       |                              |
| 1.8    | -3.682 | <i>34.80</i> | -2.406 | <i>22.73</i> | -1.276 | <i>12.06</i> | -3.217 | <i>30.40</i> | -10.581                  | 0.541     | 0.663       |                              |
| 1.9    | -3.644 | <i>34.67</i> | -2.365 | <i>22.50</i> | -1.279 | <i>12.17</i> | -3.222 | <i>30.66</i> | -10.510                  | 0.526     | 0.670       |                              |
| 2.0    | -3.573 | <i>34.39</i> | -2.291 | <i>22.06</i> | -1.281 | <i>12.34</i> | -3.242 | <i>31.21</i> | -10.387                  | 0.514     | 0.673       |                              |

**Table S14.** G:C//T:A-10-3.15 Energy terms in *kcal/mol* and the transferred charges in *e* units. Percentages of the relevant energy components were italicized.

| d(D-H) | GD     | %GD          | FRZ*  | %FRZ*        | POL    | %POL         | CT     | %CT          | $E_{\text{interaction}}$ | Upward CT | Downward CT | —CT, —FRZ, —POL, —GD, —E_int |
|--------|--------|--------------|-------|--------------|--------|--------------|--------|--------------|--------------------------|-----------|-------------|------------------------------|
| 0.9    | -1.663 | <i>14.93</i> | 0.473 | <i>-4.25</i> | -2.136 | <i>19.18</i> | -7.814 | <i>70.14</i> | -11.141                  | 1.190     | 1.389       |                              |
| 1.0    | -1.636 | <i>14.63</i> | 0.474 | <i>-4.24</i> | -2.110 | <i>18.86</i> | -7.914 | <i>70.75</i> | -11.186                  | 1.192     | 1.397       |                              |
| 1.1    | -1.597 | <i>14.26</i> | 0.487 | <i>-4.35</i> | -2.084 | <i>18.61</i> | -8.003 | <i>71.48</i> | -11.196                  | 1.197     | 1.412       |                              |
| 1.2    | -1.531 | <i>13.76</i> | 0.521 | <i>-4.68</i> | -2.052 | <i>18.44</i> | -8.066 | <i>72.48</i> | -11.128                  | 1.204     | 1.431       |                              |
| 1.3    | -1.433 | <i>13.05</i> | 0.585 | <i>-5.33</i> | -2.018 | <i>18.38</i> | -8.115 | <i>73.91</i> | -10.980                  | 1.214     | 1.445       |                              |
| 1.4    | -1.327 | <i>12.27</i> | 0.666 | <i>-6.16</i> | -1.993 | <i>18.44</i> | -8.157 | <i>75.45</i> | -10.811                  | 1.225     | 1.452       |                              |
| 1.5    | -1.235 | <i>11.60</i> | 0.741 | <i>-6.96</i> | -1.976 | <i>18.56</i> | -8.175 | <i>76.80</i> | -10.645                  | 1.232     | 1.452       |                              |
| 1.6    | -1.158 | <i>11.05</i> | 0.812 | <i>-7.75</i> | -1.970 | <i>18.80</i> | -8.164 | <i>77.90</i> | -10.480                  | 1.238     | 1.442       |                              |
| 1.7    | -1.120 | <i>10.79</i> | 0.857 | <i>-8.26</i> | -1.977 | <i>19.04</i> | -8.141 | <i>78.42</i> | -10.380                  | 1.250     | 1.419       |                              |
| 1.8    | -1.146 | <i>11.03</i> | 0.852 | <i>-8.20</i> | -1.998 | <i>19.23</i> | -8.102 | <i>77.95</i> | -10.394                  | 1.262     | 1.387       |                              |
| 1.9    | -1.201 | <i>11.48</i> | 0.823 | <i>-7.87</i> | -2.024 | <i>19.35</i> | -8.058 | <i>77.03</i> | -10.460                  | 1.267     | 1.357       |                              |
| 2.0    | -1.256 | <i>11.93</i> | 0.798 | <i>-7.58</i> | -2.053 | <i>19.51</i> | -8.011 | <i>76.13</i> | -10.523                  | 1.279     | 1.325       |                              |

\* Positive values of FRZ component are due to predominance of the repulsive exchange interactions appearing at small rise parameters below 3.3 Å with zero twist angle. FRZ term includes two nonseparable contributions: permanent electrostatics interactions and Pauli repulsions as in ref (56).

**Table S15.** T:A//A:T-08-3.16 Energy terms in *kcal/mol* and the transferred charges in *e* units. Percentages of the relevant energy components were italicized.

| d(D-H) | GD     | %GD          | FRZ    | %FRZ         | POL    | %POL         | CT     | %CT          | $E_{\text{interaction}}$ | Upward CT | Downward CT | —CT, —FRZ, —POL, —GD, —E_int |
|--------|--------|--------------|--------|--------------|--------|--------------|--------|--------------|--------------------------|-----------|-------------|------------------------------|
| 0.9    | -2.493 | <i>21.37</i> | -1.109 | <i>9.50</i>  | -1.384 | <i>11.87</i> | -6.681 | <i>57.26</i> | -11.666                  | 1.480     | 1.480       |                              |
| 1.0    | -2.680 | <i>22.09</i> | -1.322 | <i>10.90</i> | -1.358 | <i>11.19</i> | -6.772 | <i>55.82</i> | -12.132                  | 1.503     | 1.503       |                              |
| 1.1    | -2.879 | <i>22.80</i> | -1.553 | <i>12.30</i> | -1.326 | <i>10.50</i> | -6.867 | <i>54.39</i> | -12.625                  | 1.533     | 1.533       |                              |
| 1.2    | -3.101 | <i>23.61</i> | -1.803 | <i>13.73</i> | -1.298 | <i>9.88</i>  | -6.934 | <i>52.79</i> | -13.135                  | 1.570     | 1.570       |                              |
| 1.3    | -3.345 | <i>24.46</i> | -2.068 | <i>15.12</i> | -1.278 | <i>9.34</i>  | -6.984 | <i>51.07</i> | -13.675                  | 1.613     | 1.613       |                              |
| 1.4    | -3.603 | <i>25.29</i> | -2.331 | <i>16.36</i> | -1.272 | <i>8.93</i>  | -7.042 | <i>49.42</i> | -14.248                  | 1.666     | 1.666       |                              |
| 1.5    | -3.857 | <i>26.04</i> | -2.571 | <i>17.36</i> | -1.286 | <i>8.68</i>  | -7.100 | <i>47.93</i> | -14.813                  | 1.722     | 1.722       |                              |
| 1.6    | -4.081 | <i>26.63</i> | -2.775 | <i>18.11</i> | -1.305 | <i>8.52</i>  | -7.163 | <i>46.74</i> | -15.325                  | 1.771     | 1.771       |                              |
| 1.7    | -4.246 | <i>26.98</i> | -2.908 | <i>18.48</i> | -1.338 | <i>8.50</i>  | -7.247 | <i>46.05</i> | -15.738                  | 1.815     | 1.815       |                              |
| 1.8    | -4.369 | <i>27.18</i> | -2.990 | <i>18.60</i> | -1.379 | <i>8.57</i>  | -7.339 | <i>45.65</i> | -16.076                  | 1.858     | 1.858       |                              |
| 1.9    | -4.491 | <i>27.37</i> | -3.065 | <i>18.68</i> | -1.427 | <i>8.70</i>  | -7.424 | <i>45.25</i> | -16.407                  | 1.895     | 1.895       |                              |
| 2.0    | -4.656 | <i>27.77</i> | -3.179 | <i>18.96</i> | -1.477 | <i>8.81</i>  | -7.454 | <i>44.46</i> | -16.766                  | 1.923     | 1.923       |                              |

**Table S16.** T:A//G:C-0-3.19 Energy terms in *kcal/mol* and the transferred charges in *e* units. Percentages of the relevant energy components were italicized.

| d(D-H) | GD     | %GD          | FRZ    | %FRZ         | POL    | %POL         | CT    | %CT          | $E_{\text{interaction}}$ | Upward CT | Downward CT | —CT, —FRZ, —POL, —GD, —E_int |
|--------|--------|--------------|--------|--------------|--------|--------------|-------|--------------|--------------------------|-----------|-------------|------------------------------|
| 0.9    | -4.676 | <i>28.91</i> | -2.981 | <i>18.42</i> | -1.696 | <i>10.48</i> | -6.82 | <i>42.18</i> | -16.177                  | 1.366     | 1.037       |                              |
| 1.0    | -4.613 | <i>28.59</i> | -2.934 | <i>18.18</i> | -1.679 | <i>10.41</i> | -6.91 | <i>42.82</i> | -16.135                  | 1.383     | 1.032       |                              |
| 1.1    | -4.513 | <i>28.19</i> | -2.852 | <i>17.82</i> | -1.661 | <i>10.37</i> | -6.98 | <i>43.62</i> | -16.008                  | 1.399     | 1.030       |                              |
| 1.2    | -4.378 | <i>27.68</i> | -2.743 | <i>17.35</i> | -1.635 | <i>10.34</i> | -7.06 | <i>44.63</i> | -15.814                  | 1.420     | 1.028       |                              |
| 1.3    | -4.256 | <i>27.24</i> | -2.643 | <i>16.92</i> | -1.613 | <i>10.33</i> | -7.11 | <i>45.51</i> | -15.623                  | 1.444     | 1.027       |                              |
| 1.4    | -4.168 | <i>26.92</i> | -2.566 | <i>16.57</i> | -1.603 | <i>10.35</i> | -7.15 | <i>46.16</i> | -15.484                  | 1.469     | 1.033       |                              |
| 1.5    | -4.121 | <i>26.73</i> | -2.518 | <i>16.34</i> | -1.603 | <i>10.40</i> | -7.17 | <i>46.53</i> | -15.414                  | 1.494     | 1.041       |                              |
| 1.6    | -4.114 | <i>26.67</i> | -2.508 | <i>16.26</i> | -1.606 | <i>10.41</i> | -7.20 | <i>46.65</i> | -15.424                  | 1.515     | 1.046       |                              |
| 1.7    | -4.150 | <i>26.72</i> | -2.524 | <i>16.25</i> | -1.626 | <i>10.47</i> | -7.23 | <i>46.57</i> | -15.533                  | 1.533     | 1.048       |                              |
| 1.8    | -4.242 | <i>26.99</i> | -2.585 | <i>16.45</i> | -1.657 | <i>10.54</i> | -7.23 | <i>46.02</i> | -15.720                  | 1.546     | 1.047       |                              |
| 1.9    | -4.367 | <i>27.40</i> | -2.676 | <i>16.79</i> | -1.691 | <i>10.61</i> | -7.20 | <i>45.20</i> | -15.938                  | 1.551     | 1.043       |                              |
| 2.0    | -4.486 | <i>27.80</i> | -2.761 | <i>17.11</i> | -1.725 | <i>10.69</i> | -7.16 | <i>44.40</i> | -16.137                  | 1.547     | 1.038       |                              |

**Table S17.** Comparison of the base stacking energies of the dinucleotide steps at M06-2X/cc-pVTZ level with their corresponding values in high-quality literature data (kcal/mol).

| Dinucleotide Step | Ref. (9) | This work | Difference |
|-------------------|----------|-----------|------------|
| A:T   A:T-0-3.24  | -13.12   | -11.50    | 1.62       |
| A:T   A:T-0-3.34  | -13.10   | -12.56    | 0.54       |
| A:T   A:T-0-3.44  | -12.57   | -13.06    | -0.49      |
| A:T //A:T-20-3.05 | -14.74   | -14.44    | 0.30       |
| A:T //A:T-20-3.15 | -14.73   | -15.36    | -0.63      |
| A:T //A:T-20-3.25 | -14.07   | -15.04    | -0.97      |
| A:T//G:C-08-3.19  | -12.50   | -13.03    | -0.53      |
| A:T//T:A-10-3.26  | -13.30   | -12.20    | 1.10       |
| G:C//A:T-10-3.15  | -12.90   | -11.78    | 1.12       |
| G:C C:G-0-3.25    | -15.80   | -15.34    | 0.46       |
| G:C G:C-0-3.26    | -11.20   | -8.49     | 2.71       |
| G:C G:C-0-3.36    | -13.66   | -9.01     | 4.65       |
| G:C G:C-0-3.46    | -12.87   | -9.18     | 3.69       |
| G:C//T:A-10-3.15  | -13.40   | -11.19    | 2.21       |
| T:A//A:T-08-3.16  | -12.80   | -12.13    | 0.67       |
| T:A G:C-0-3.19    | -15.10   | -16.14    | 1.04       |

**Table S18.** Total Dipole Moment values (in debye) of dinucleotide steps in every step during DPT reactions.

| d(D-H) | A:T  A:T-0-3.24  | A:T  A:T-0-3.34 | A:T  A:T-0-3.44 | A:T  A:T-20-3.05 | A:T  A:T-20-3.15 | A:T  A:T-20-3.25 | A:T//G:C-08-3.19 | A:T//T:A-10-3.26 |
|--------|------------------|-----------------|-----------------|------------------|------------------|------------------|------------------|------------------|
| 0.9    | 3.3519           | 3.3539          | 3.3590          | 3.4759           | 3.4437           | 3.4197           | 7.2685           | 0.0454           |
| 1.0    | 3.0826           | 3.0856          | 3.0920          | 3.1840           | 3.1538           | 3.1290           | 7.0815           | 0.0999           |
| 1.1    | 2.6756           | 2.6794          | 2.6892          | 2.7375           | 2.7121           | 2.6889           | 6.8224           | 0.1711           |
| 1.2    | 2.1659           | 2.1712          | 2.1728          | 2.1938           | 2.1709           | 2.1518           | 6.4944           | 0.2531           |
| 1.3    | 1.6666           | 1.6741          | 1.6856          | 1.6881           | 1.6711           | 1.6584           | 6.1512           | 0.3208           |
| 1.4    | 1.2342           | 1.2416          | 1.2535          | 1.3823           | 1.3752           | 1.3734           | 5.8565           | 0.3634           |
| 1.5    | 0.9218           | 0.9301          | 0.9435          | 1.3357           | 1.3372           | 1.3472           | 5.6503           | 0.3739           |
| 1.6    | 0.7902           | 0.7991          | 0.8127          | 1.4622           | 1.4713           | 1.4831           | 5.546            | 0.3473           |
| 1.7    | 0.8794           | 0.8857          | 0.8984          | 1.6562           | 1.6694           | 1.6775           | 5.5988           | 0.2717           |
| 1.8    | 1.1847           | 1.1923          | 1.2021          | 1.9199           | 1.9300           | 1.9363           | 5.7847           | 0.1547           |
| 1.9    | 1.6751           | 1.6821          | 1.6909          | 2.3021           | 2.3046           | 2.3096           | 6.0546           | 0.0104           |
| 2.0    | 2.2802           | 2.2864          | 2.2946          | 2.8187           | 2.8205           | 2.8230           | 6.3823           | 0.1503           |
| d(D-H) | G:C//A:T-10-3.15 | G:C  C:G-0-3.25 | G:C  G:C-0-3.26 | G:C  G:C-0-3.36  | G:C  G:C-0-3.46  | G:C//T:A-10-3.15 | T:A//A:T-8-3.16  | T:A  G:C-0-3.19  |
| 0.9    | 6.5625           | 4.8159          | 10.3850         | 10.4071          | 10.4239          | 3.9680           | 1.8089           | 4.4017           |
| 1.0    | 6.4008           | 4.7708          | 10.2772         | 10.3002          | 10.3200          | 4.0197           | 1.7294           | 4.4307           |
| 1.1    | 6.1849           | 4.7343          | 10.1681         | 10.1939          | 10.2125          | 4.1305           | 1.5945           | 4.5015           |
| 1.2    | 5.9159           | 4.7064          | 10.0349         | 10.0607          | 10.0812          | 4.2858           | 1.4046           | 4.5981           |
| 1.3    | 5.6437           | 4.6840          | 9.8852          | 9.9120           | 9.9314           | 4.4444           | 1.1979           | 4.6729           |
| 1.4    | 5.4336           | 4.6679          | 9.7762          | 9.8024           | 9.823            | 4.6024           | 1.003            | 4.7432           |
| 1.5    | 5.3117           | 4.6542          | 9.7284          | 9.7542           | 9.7754           | 4.7392           | 0.8433           | 4.7956           |
| 1.6    | 5.2623           | 4.6363          | 9.6939          | 9.7197           | 9.7402           | 4.8007           | 0.7526           | 4.7712           |
| 1.7    | 5.3337           | 4.6220          | 9.7164          | 9.7424           | 9.7632           | 4.7823           | 0.7588           | 4.6669           |
| 1.8    | 5.5131           | 4.6119          | 9.7762          | 9.8015           | 9.8229           | 4.6958           | 0.8483           | 4.4907           |
| 1.9    | 5.7541           | 4.6084          | 9.8252          | 9.8481           | 9.8653           | 4.5295           | 1.0025           | 4.2421           |
| 2.0    | 6.0387           | 4.6252          | 9.8667          | 9.8884           | 9.9045           | 4.3296           | 1.1896           | 3.9649           |

**Table S19.** Total energy values (in a.u) of dinucleotide steps in every step during DPT reactions. The cases of which d(D-H) is equal to 1.6 Å can be nearly accepted as transition state of the rare WC pair formations in dinucleotide steps.  $\Delta E(C \rightarrow R)$  stands for potential barrier high for transition from canonical and rare base pairs in kcal/mol.

| d(D-H)                      | A:T  A:T-0-3.24  | A:T  A:T-0-3.34 | A:T  A:T-0-3.44 | A:T  A:T-20-3.05 | A:T  A:T-20-3.15 | A:T  A:T-20-3.25 | A:T//G:C-08-3.19 | A:T//T:A-10-3.26 |
|-----------------------------|------------------|-----------------|-----------------|------------------|------------------|------------------|------------------|------------------|
| 0.9                         | -1842.878643     | -1842.881370    | -1842.883512    | -1842.876341     | -1842.879005     | -1842.880230     | -1858.941486     | -1842.880142     |
| 1.0                         | -1842.936207     | -1842.938927    | -1842.941048    | -1842.934035     | -1842.936656     | -1842.937880     | -1858.999117     | -1842.937439     |
| 1.1                         | -1842.924758     | -1842.927496    | -1842.929563    | -1842.922590     | -1842.925183     | -1842.926380     | -1858.987972     | -1842.925536     |
| 1.2                         | -1842.881613     | -1842.884371    | -1842.886364    | -1842.878997     | -1842.881584     | -1842.882761     | -1858.945668     | -1842.881687     |
| 1.3                         | -1842.829353     | -1842.832127    | -1842.834138    | -1842.825661     | -1842.828263     | -1842.829470     | -1858.895192     | -1842.828746     |
| 1.4                         | -1842.782712     | -1842.785495    | -1842.787562    | -1842.777174     | -1842.779857     | -1842.781145     | -1858.851011     | -1842.781474     |
| 1.5                         | -1842.750645     | -1842.753434    | -1842.755536    | -1842.742704     | -1842.745456     | -1842.746810     | -1858.821840     | -1842.748652     |
| 1.6                         | -1842.737283     | -1842.740085    | -1842.742188    | -1842.726646     | -1842.729401     | -1842.730768     | -1858.811868     | -1842.734608     |
| 1.7                         | -1842.743177     | -1842.745980    | -1842.748024    | -1842.729634     | -1842.732385     | -1842.733695     | -1858.820938     | -1842.739747     |
| 1.8                         | -1842.763996     | -1842.766823    | -1842.768824    | -1842.748327     | -1842.751101     | -1842.752433     | -1858.843813     | -1842.760376     |
| 1.9                         | -1842.789423     | -1842.792267    | -1842.794273    | -1842.773665     | -1842.776446     | -1842.777844     | -1858.868720     | -1842.786274     |
| 2.0                         | -1842.801675     | -1842.804531    | -1842.806597    | -1842.789719     | -1842.792515     | -1842.793931     | -1858.874572     | -1842.800073     |
| $\Delta E(C \rightarrow R)$ | 124.827          | 124.775         | 124.787         | 130.139          | 130.055          | 129.965          | 117.501          | 127.278          |
| d(D-H)                      | G:C//A:T-10-3.15 | G:C  C:G-0-3.25 | G:C  G:C-0-3.26 | G:C  G:C-0-3.36  | G:C  G:C-0-3.46  | G:C//T:A-10-3.15 | T:A//A:T-8-3.16  | T:A  G:C-0-3.19  |
| 0.9                         | -1858.938555     | -1875.002881    | -1874.998035    | -1875.000004     | -1875.001427     | -1858.937472     | -1842.880128     | -1858.944244     |
| 1.0                         | -1858.996616     | -1875.060850    | -1875.056262    | -1875.058218     | -1875.059600     | -1858.995156     | -1842.937664     | -1859.001678     |
| 1.1                         | -1858.985851     | -1875.050298    | -1875.046010    | -1875.047964     | -1875.049332     | -1858.984009     | -1842.926164     | -1858.990344     |
| 1.2                         | -1858.943873     | -1875.009159    | -1875.005247    | -1875.007204     | -1875.008595     | -1858.941528     | -1842.883006     | -1858.947935     |
| 1.3                         | -1858.893717     | -1874.960899    | -1874.957470    | -1874.959417     | -1874.960699     | -1858.890732     | -1842.830931     | -1858.897618     |
| 1.4                         | -1858.849900     | -1874.919962    | -1874.916837    | -1874.918753     | -1874.919896     | -1858.846288     | -1842.784475     | -1858.853775     |
| 1.5                         | -1858.821054     | -1874.894669    | -1874.891764    | -1874.893659     | -1874.894694     | -1858.816889     | -1842.752447     | -1858.825013     |
| 1.6                         | -1858.811401     | -1874.889095    | -1874.886374    | -1874.888272     | -1874.889247     | -1858.806740     | -1842.739019     | -1858.815610     |
| 1.7                         | -1858.820900     | -1874.902577    | -1874.899792    | -1874.901705     | -1874.902727     | -1858.815887     | -1842.744754     | -1858.825353     |
| 1.8                         | -1858.844375     | -1874.928177    | -1874.925246    | -1874.927151     | -1874.928254     | -1858.839228     | -1842.765669     | -1858.848731     |
| 1.9                         | -1858.870095     | -1874.951882    | -1874.948718    | -1874.950633     | -1874.951821     | -1858.864972     | -1842.791599     | -1858.873579     |
| 2.0                         | -1858.877395     | -1874.948225    | -1874.944882    | -1874.946797     | -1874.947933     | -1858.872285     | -1842.805258     | -1858.878266     |
| $\Delta E(C \rightarrow R)$ | 116.224          | 107.778         | 106.606         | 106.643          | 106.898          | 118.233          | 124.652          | 116.759          |
